# Supplementary material for: Novel synthesis of a self-healing Ce based eco-friendly sealing coating to mitigate corrosion in insulators installed in industrial regions
Source: Royal Society of Chemistry journal article supplement (doi:10.1039/d1ra08223j), 2022-01-01

### Supplementary files

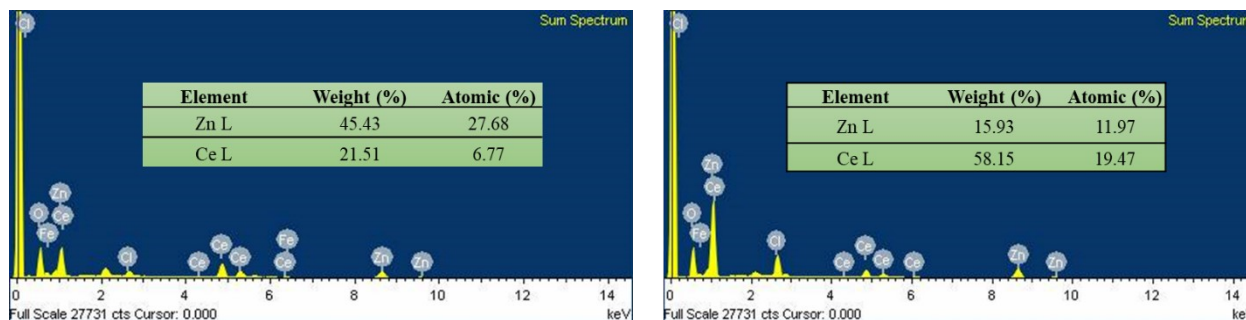

Figure 1. EDS measurements of specimens immersed in Cerium salts sealing coating bath (a) 30,000 PPM (b) 100,000 PPM

The EDS measurement of specimen immersed in 30,000 PPM and 100,000 PPM are shown in Figure 1. The weight (%) of Zn and Ce for specimens immersed in 30,000 PPM and 100,000 PPM were 43.43 %, 15.93 % and 21.51%, 58.15% respectively.

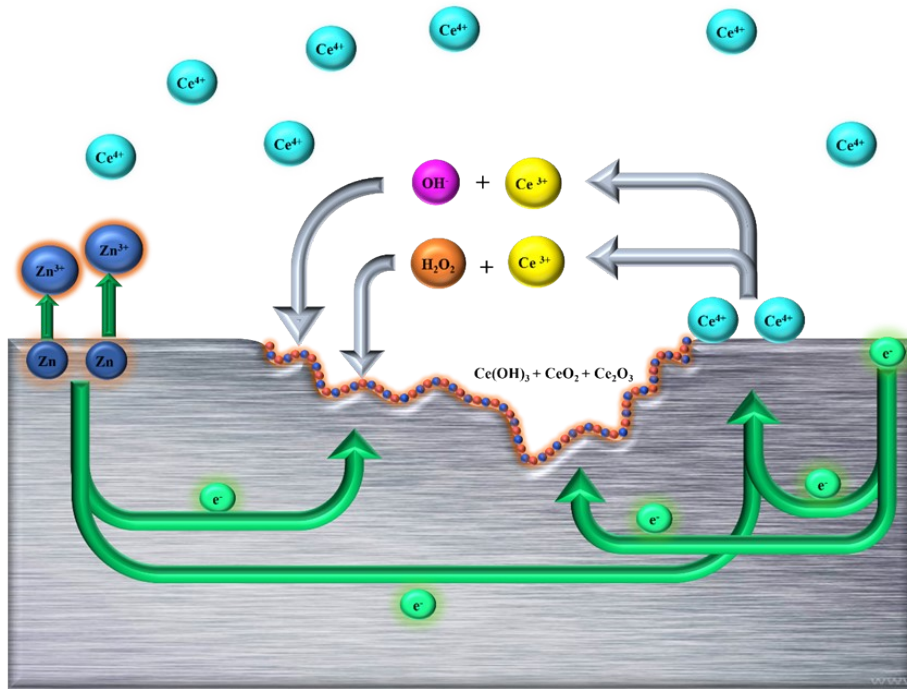

Figure 2. Schematic of protection mechanism of sealing coating

The Corrosion causes an increase in electron loss on the pin surface. The presence of  $\text{H}_2\text{O}_2$  in the sealing coating accelerates reduction or oxidation to  $\text{OH}^-/\text{O}_2$ , resulting in more  $\text{Ce}(\text{OH})_2^{2+}$ . The  $\text{Ce}^{3+}$  and  $\text{Ce}^{4+}$  precipitates produce a thick dense layer of Ce precipitate over pin preventing corrosion of pin surface. The equations supporting the mechanism are following:

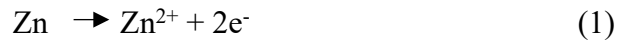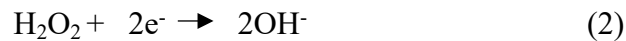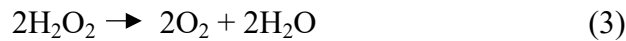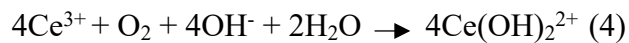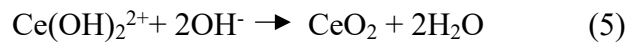

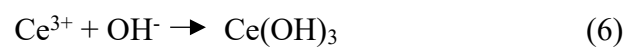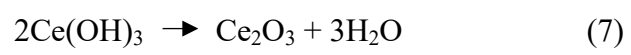

Supplement: d1ra08223j1.pdf [file d1ra08223j1.pdf]
